# Supplementary material for: Climate change impacts on hydroclimatic regimes and extremes over Andean basins in central Chile
Source: Copernicus journal article supplement (doi:10.5194/hess-2016-690), 2017-01-13
Supplement: Supplementary file [file hess-2016-690-AC1-supplement.pdf]

Table S1. Model evaluation statistics for monthly and annual time steps for the period 1970-2005

| Basin     | r (monthly) | r (annual) | RSR (monthly) | RSR (annual) | PBIAS (%) | NSE (monthly) | NSE (annual) | KGE (monthly) | KGE (annual) |
|-----------|-------------|------------|---------------|--------------|-----------|---------------|--------------|---------------|--------------|
| Rapel*    | 0.88        | 0.87       | 0.92          | 0.89         | -5.1      | 0.14          | 0.16         | 0.31          | 0.34         |
| Mataquito | 0.81        | 0.82       | 0.77          | 0.68         | -12.6     | 0.4           | 0.53         | 0.63          | 0.77         |
| Maule     | 0.87        | 0.86       | 0.71          | 0.6          | -10.8     | 0.5           | 0.62         | 0.6           | 0.82         |
| Itata     | 0.91        | 0.91       | 0.44          | 0.48         | -8.6      | 0.8           | 0.77         | 0.87          | 0.83         |

r= Pearson correlation coefficient

RSR= Ratio of RMSE to the standard deviation of the observations

PBIAS= Percent bias

NSE= Nash-Sutcliffe efficiency

KGE= Kling-Gupta efficiency

\* Due to many missing values, we choose 1990-2005 period for Rapel Basin.
